# Supplementary material for: Evolutionary acquisition of promoter-associated non-coding RNA (pancRNA) repertoires diversifies species-dependent gene activation mechanisms in mammals
Source: PubMed Central journal article supplement (PMC5383967; doi:10.1186/s12864-017-3662-1), 2017-04-07
Supplement: 12864_2017_3662_MOESM5_ESM.pdf [file 12864_2017_3662_MOESM5_ESM.pdf]

# Max Heart

## Cortex

## Cbellum

## Heart

## Kidney

## Liver

### H3K4me1

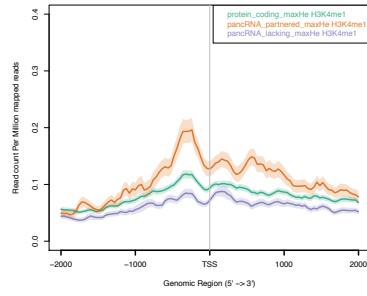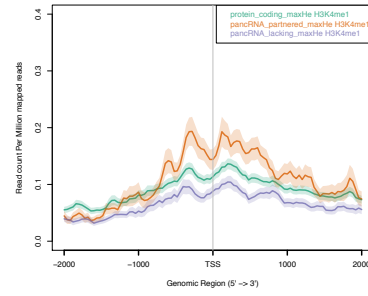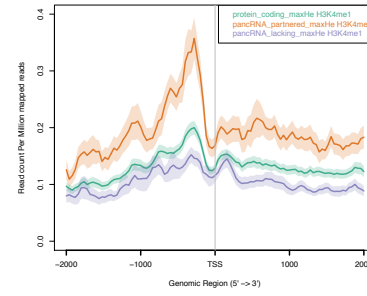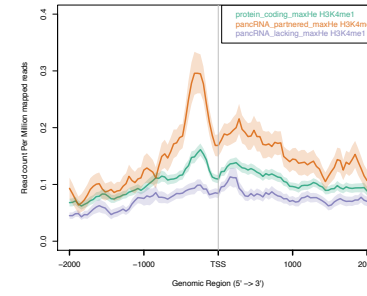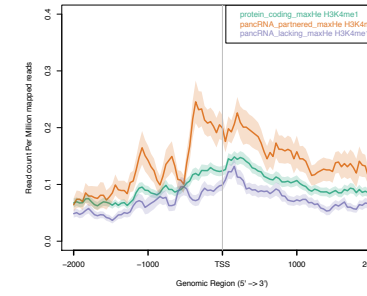

### H3K4me3

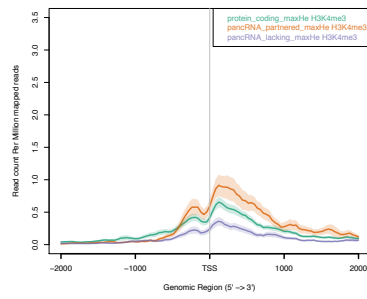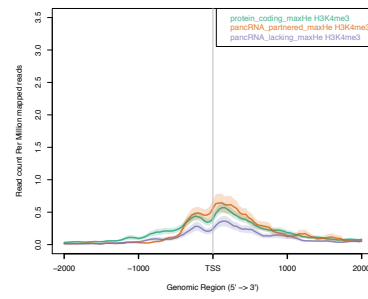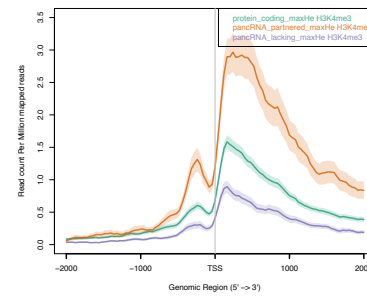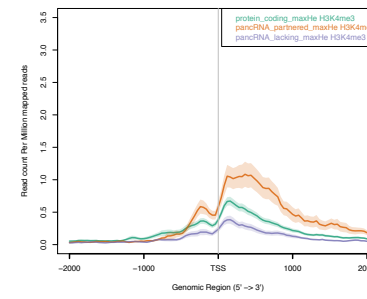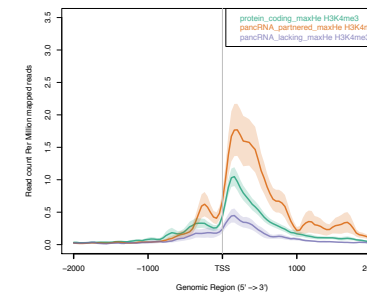

### H3K27ac

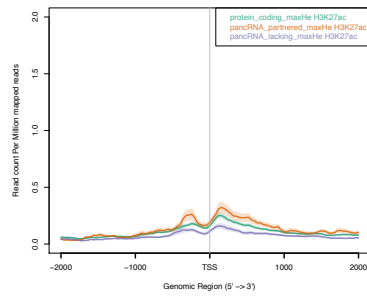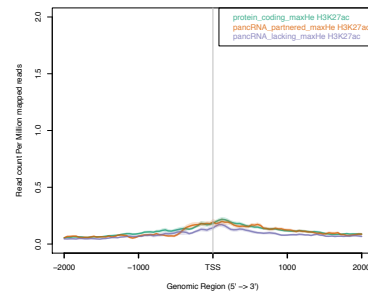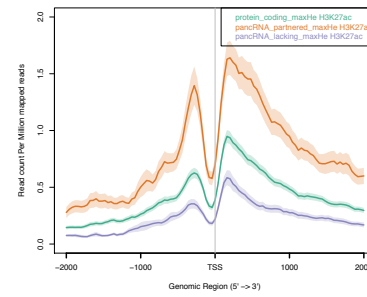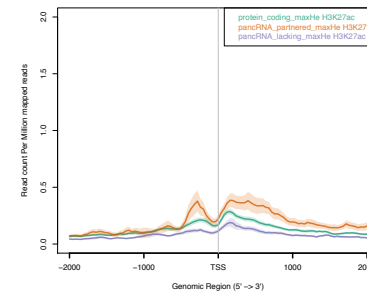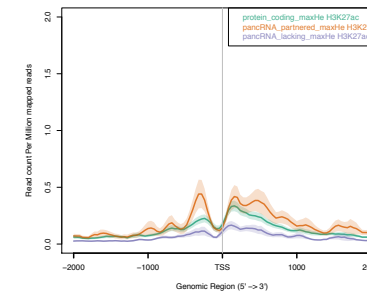

# Figure S3B

# Max Kidney

## Cortex

## Cbellum

## Heart

## Kidney

## Liver

### H3K4me1

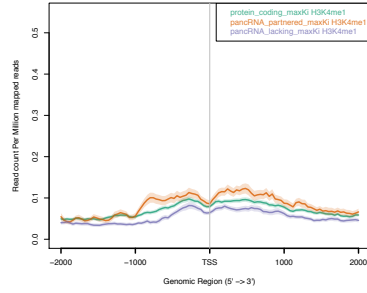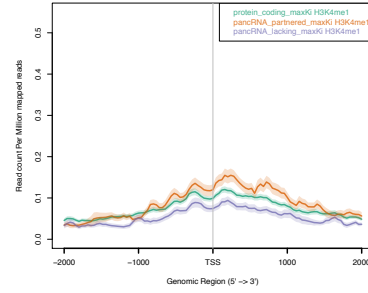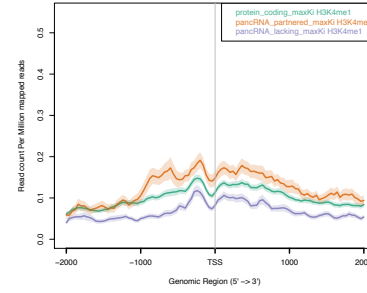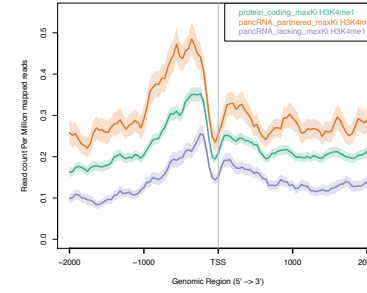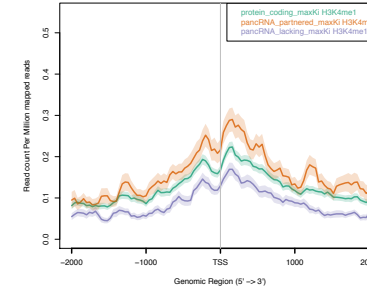

### H3K4me3

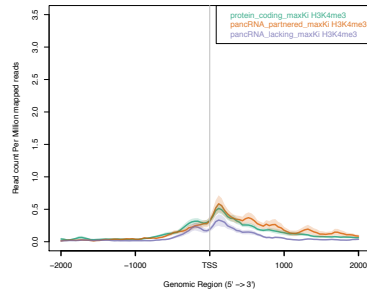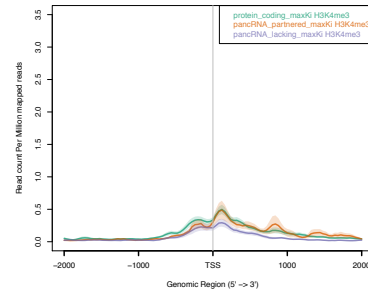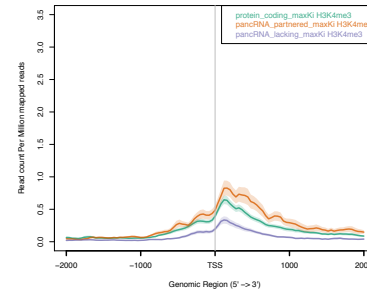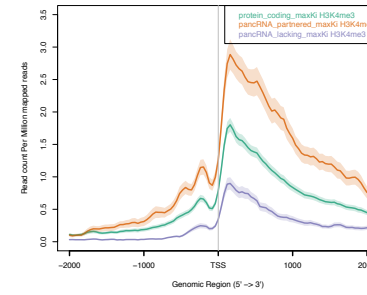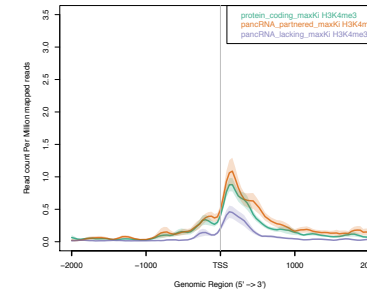

### H3K27ac

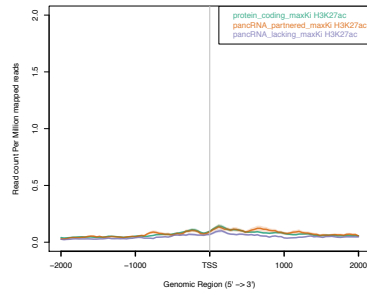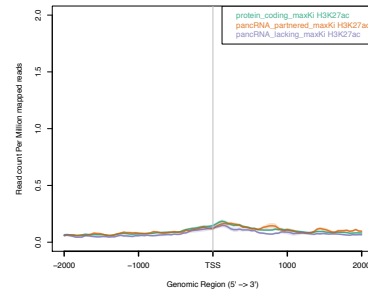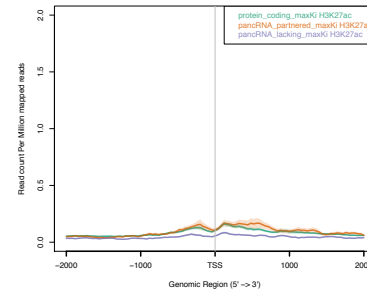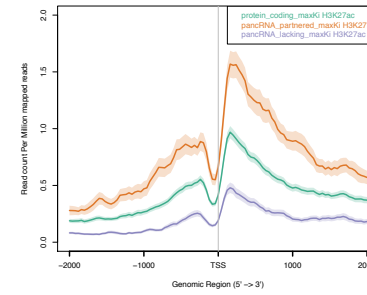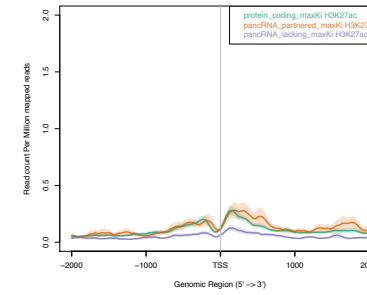

# Figure S3C

Cortex

Cbellum

Heart

Kidney

Liver

H3K4me1

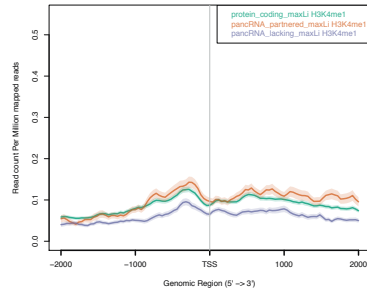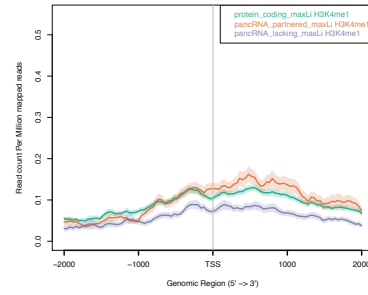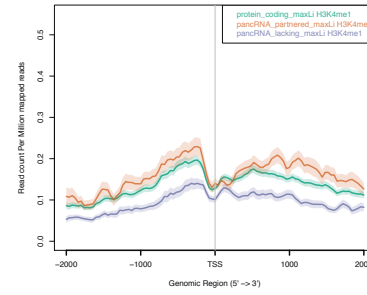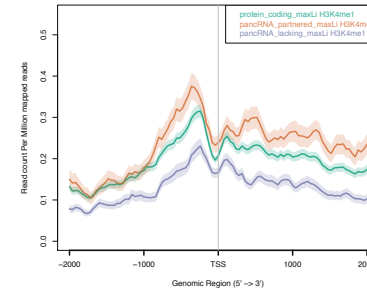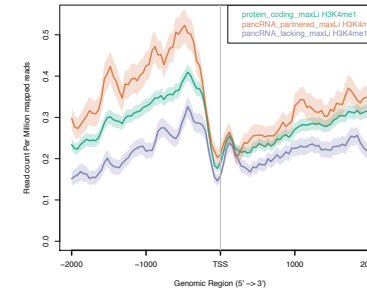

H3K4me3

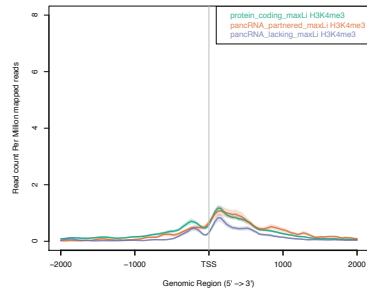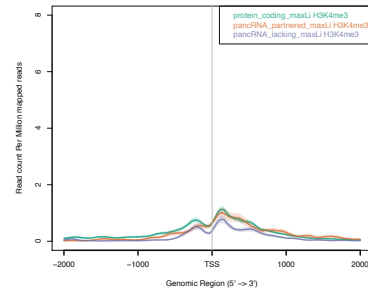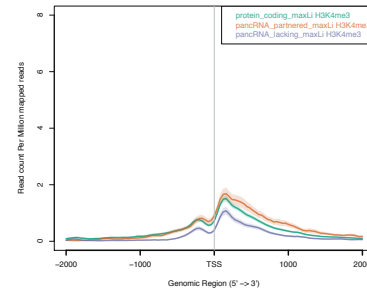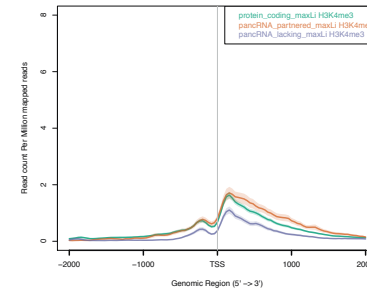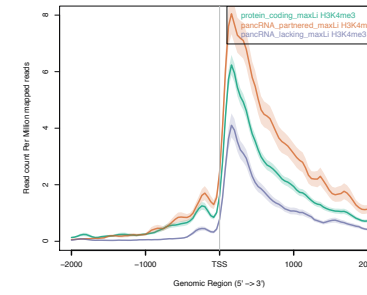

H3K27ac

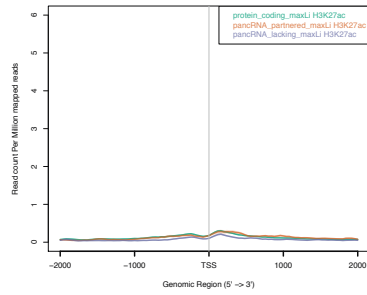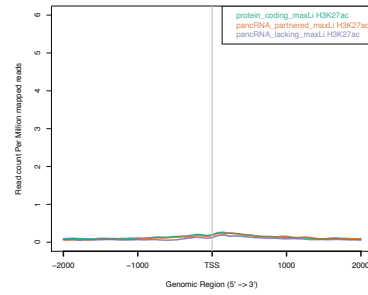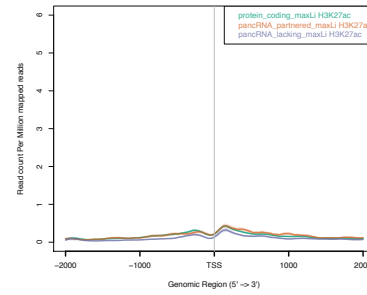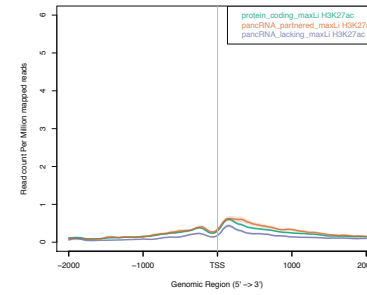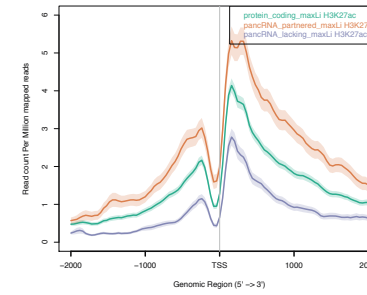

Figure S3D
