# Supplementary material for: Evolutionary acquisition of promoter-associated non-coding RNA (pancRNA) repertoires diversifies species-dependent gene activation mechanisms in mammals
Source: PubMed Central journal article supplement (PMC5383967; doi:10.1186/s12864-017-3662-1), 2017-04-07
Supplement: 12864_2017_3662_MOESM8_ESM.pdf [file 12864_2017_3662_MOESM8_ESM.pdf]

### Chimpanzee

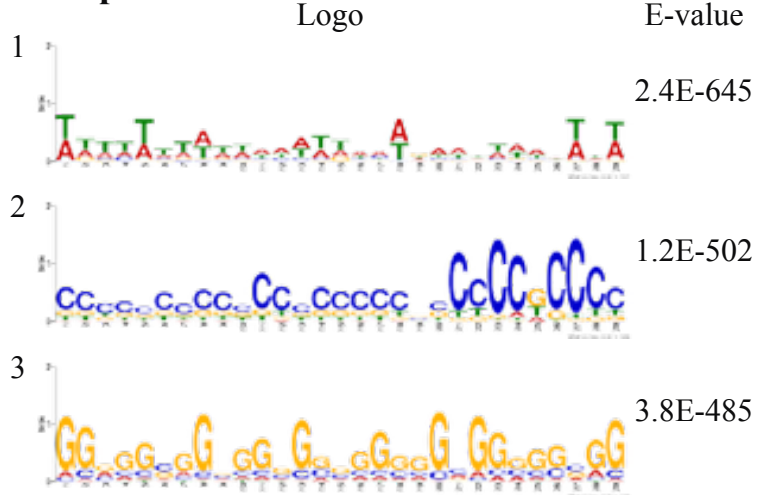

### Macaque

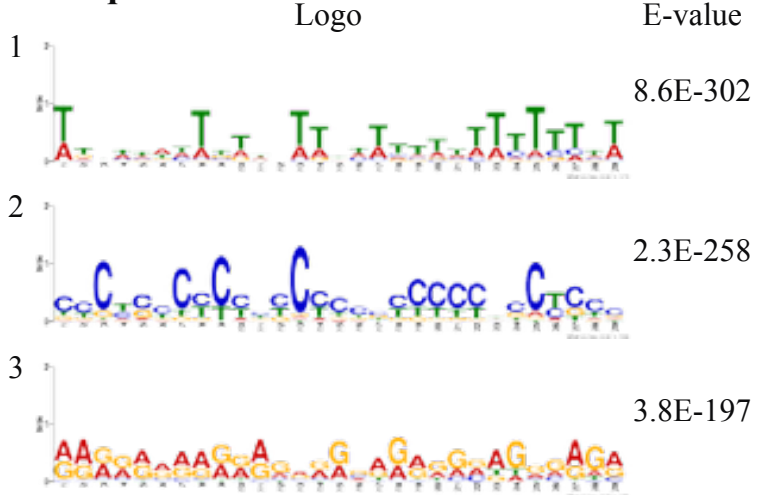

### Marmoset

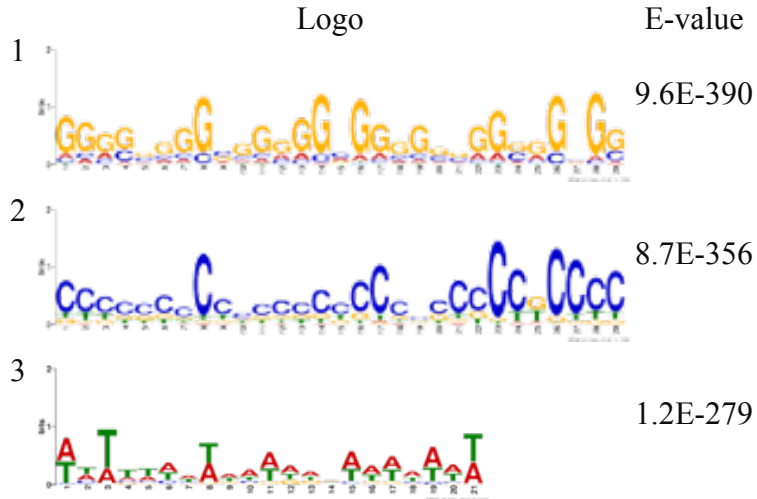

### Mouse

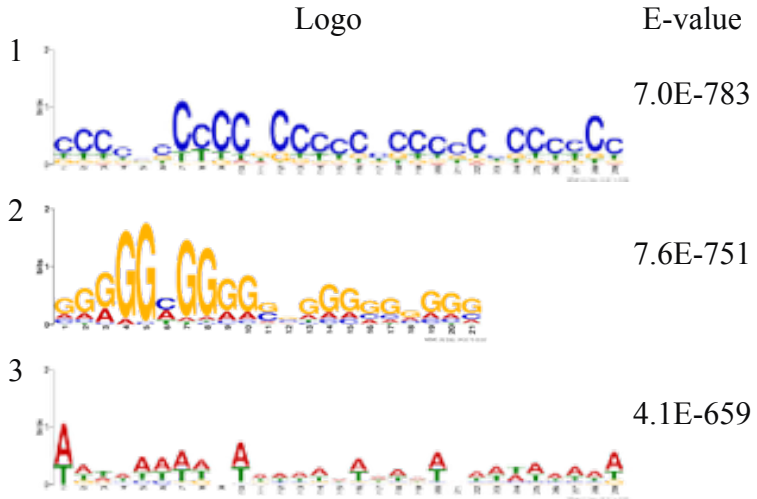

### Rat

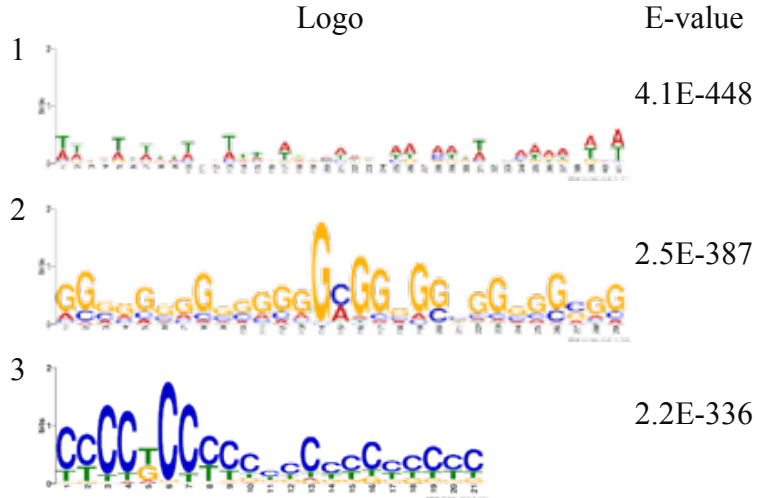

# Figure S5
